# Supplementary material for: No Evidence for Light-Induced Embolism Repair in Cut Stems of Drought-Resistant Mediterranean Species under Soaking
Source: MDPI journal article supplement (doi:10.3390/plants11030307), 2022-01-24
Supplement: s1 [file s1]

---

# Supplementary material

**Article title:** No evidence for light-induced embolism repair in cut stems of drought-resistant Mediterranean species under soaking

Martina Tomasella<sup>1</sup>, Sara Natale<sup>1</sup>, Francesco Petruzzellis<sup>1,2</sup>, Sara Di Bert<sup>1</sup>, Lorenzo D'Amico<sup>3,4</sup>, Giuliana Tromba<sup>3</sup> and Andrea Nardini<sup>1,\*</sup>

<sup>1</sup> Dipartimento di Scienze della Vita, Università di Trieste. Via L. Giorgieri 10, 34127 Trieste (Italy);

<sup>2</sup> Dipartimento di Scienze Agroalimentari, Ambientali e Animali, Università di Udine. Via delle Scienze 91, 33100 Udine, Italy;

<sup>3</sup> Elettra-Sincrotrone Trieste, Area Science Park, 34149, Basovizza, Italy

<sup>4</sup> Dipartimento di Fisica, Università di Trieste. Via A. Valerio 2, 34127 Trieste (Italy)

\* Correspondence: [nardini@units.it](mailto:nardini@units.it).

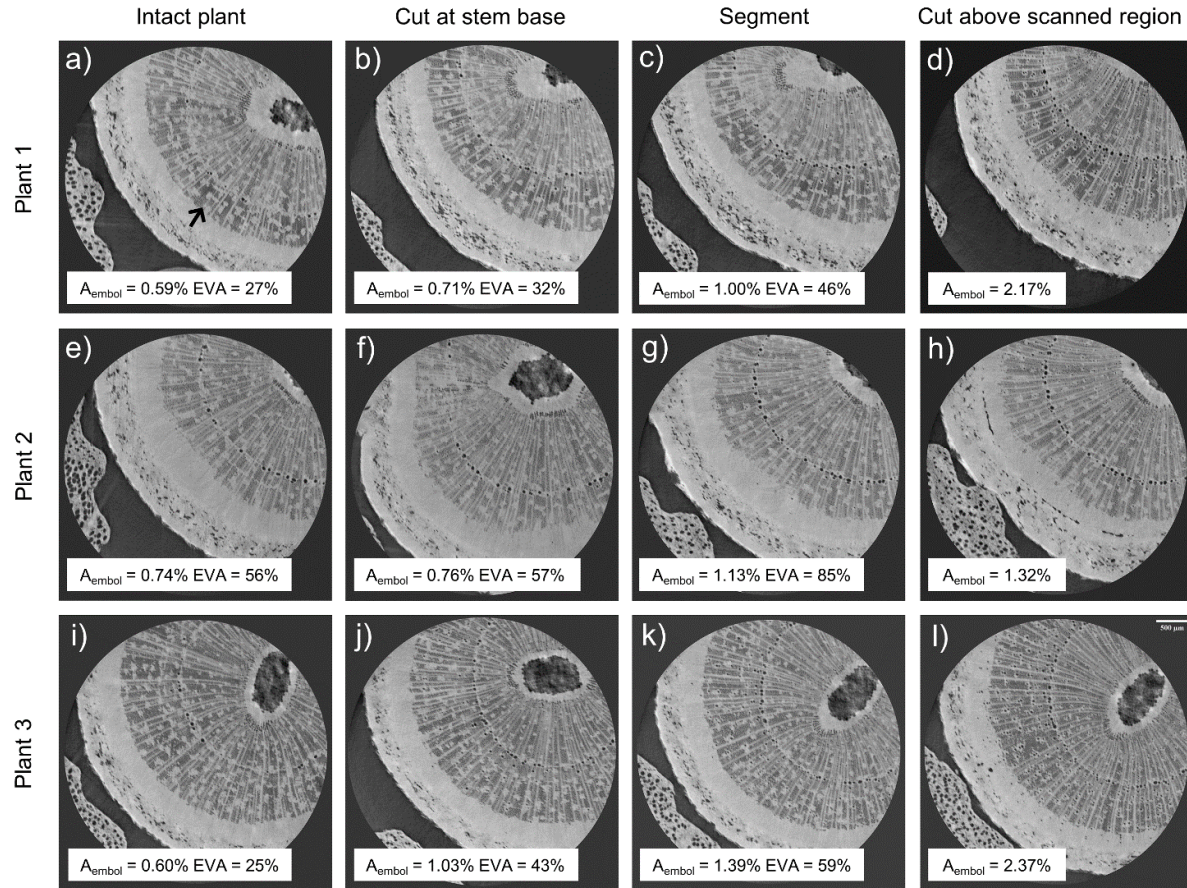

**Figure S1.** X-ray Micro-CT transverse images of drought stressed 2-year-old *F. ornus* saplings (n=3). Scans were performed in drought-stressed intact plants (a,e,i), after subsequent cut underwater at the base of the stem (b,f,j), after a second cut underwater to obtain a stem segment (c,g,k) and after cutting above the scanned region to embolize all mature conduits (d,h,l).  $A_{\text{embol}}$  = percentage of embolized sapwood area; EVA = percentage of embolized vessel area, all calculated excluding the immature sapwood close to the cambium (see arrow delimiting mature-immature sapwood in a).

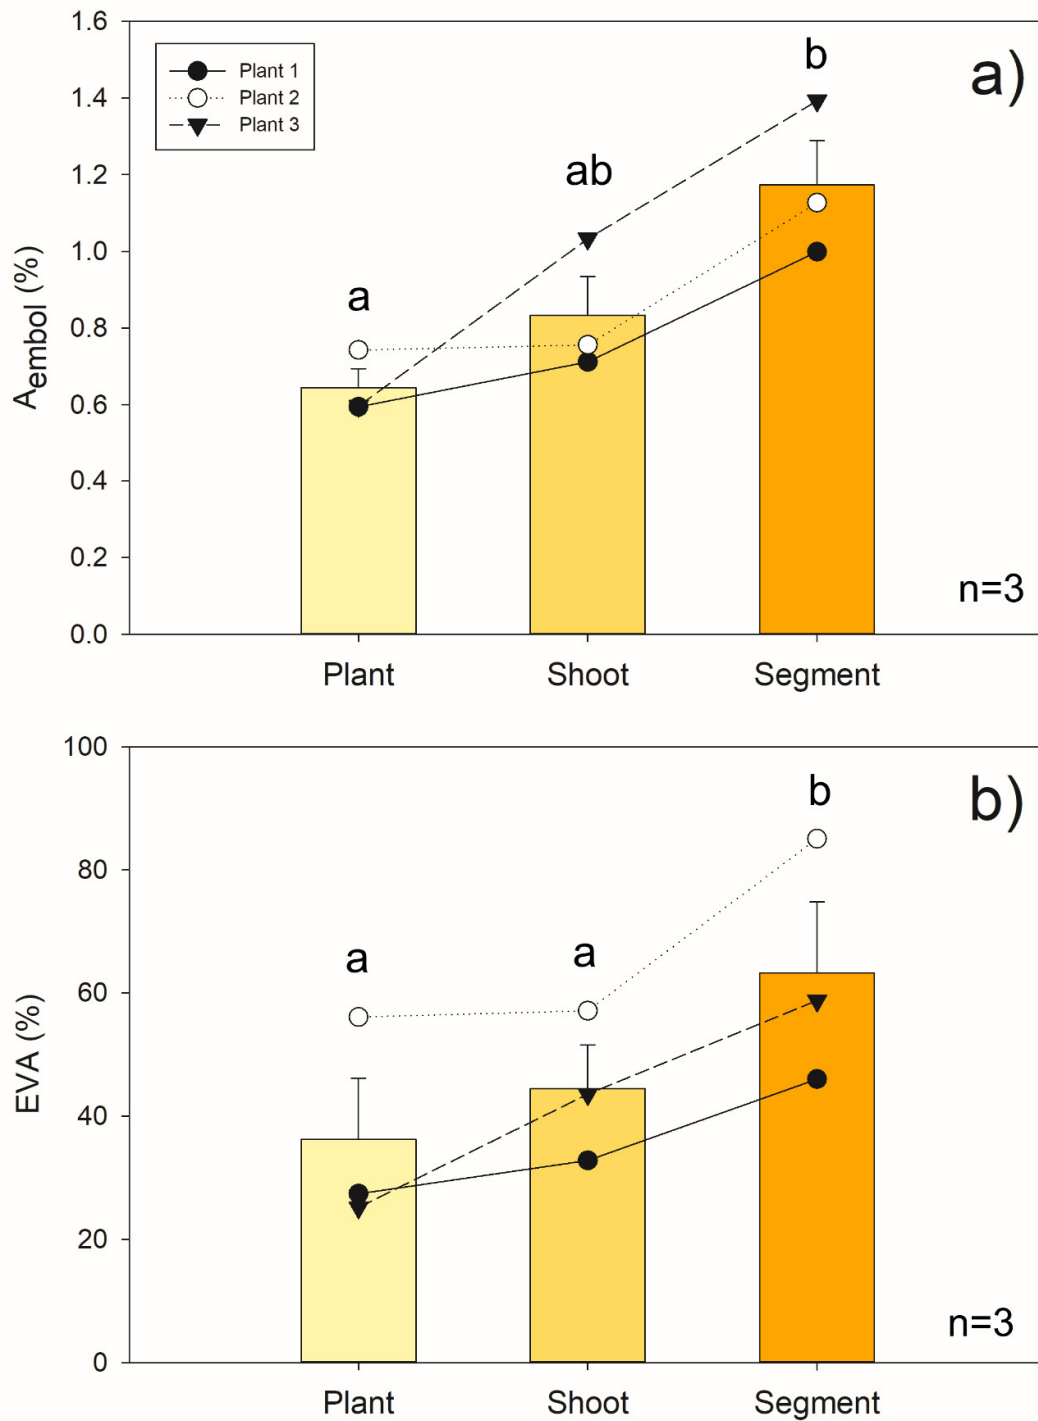

**Figure S2.** Cutting effect on embolism formation in *F. ornus* potted saplings visualized with Micro-CT. **a)** Percentage of embolized sapwood area ( $A_{\text{embol}}$ ) and **b)** percentage of embolized vessel area (EVA) measured in Micro-CT transverse images of drought-stressed saplings. Plants (1-3, indicated by symbols,  $n=3$ ) were consecutively scanned when intact (Plant), after subsequent cut underwater at the base of the stem (Shoot) and after a second cut underwater to obtain a stem segment (Segment). Values are means  $\pm$  SE. Different letters denote statistically significant differences among Plant, Shoot and Segment ( $P < 0.05$ ).



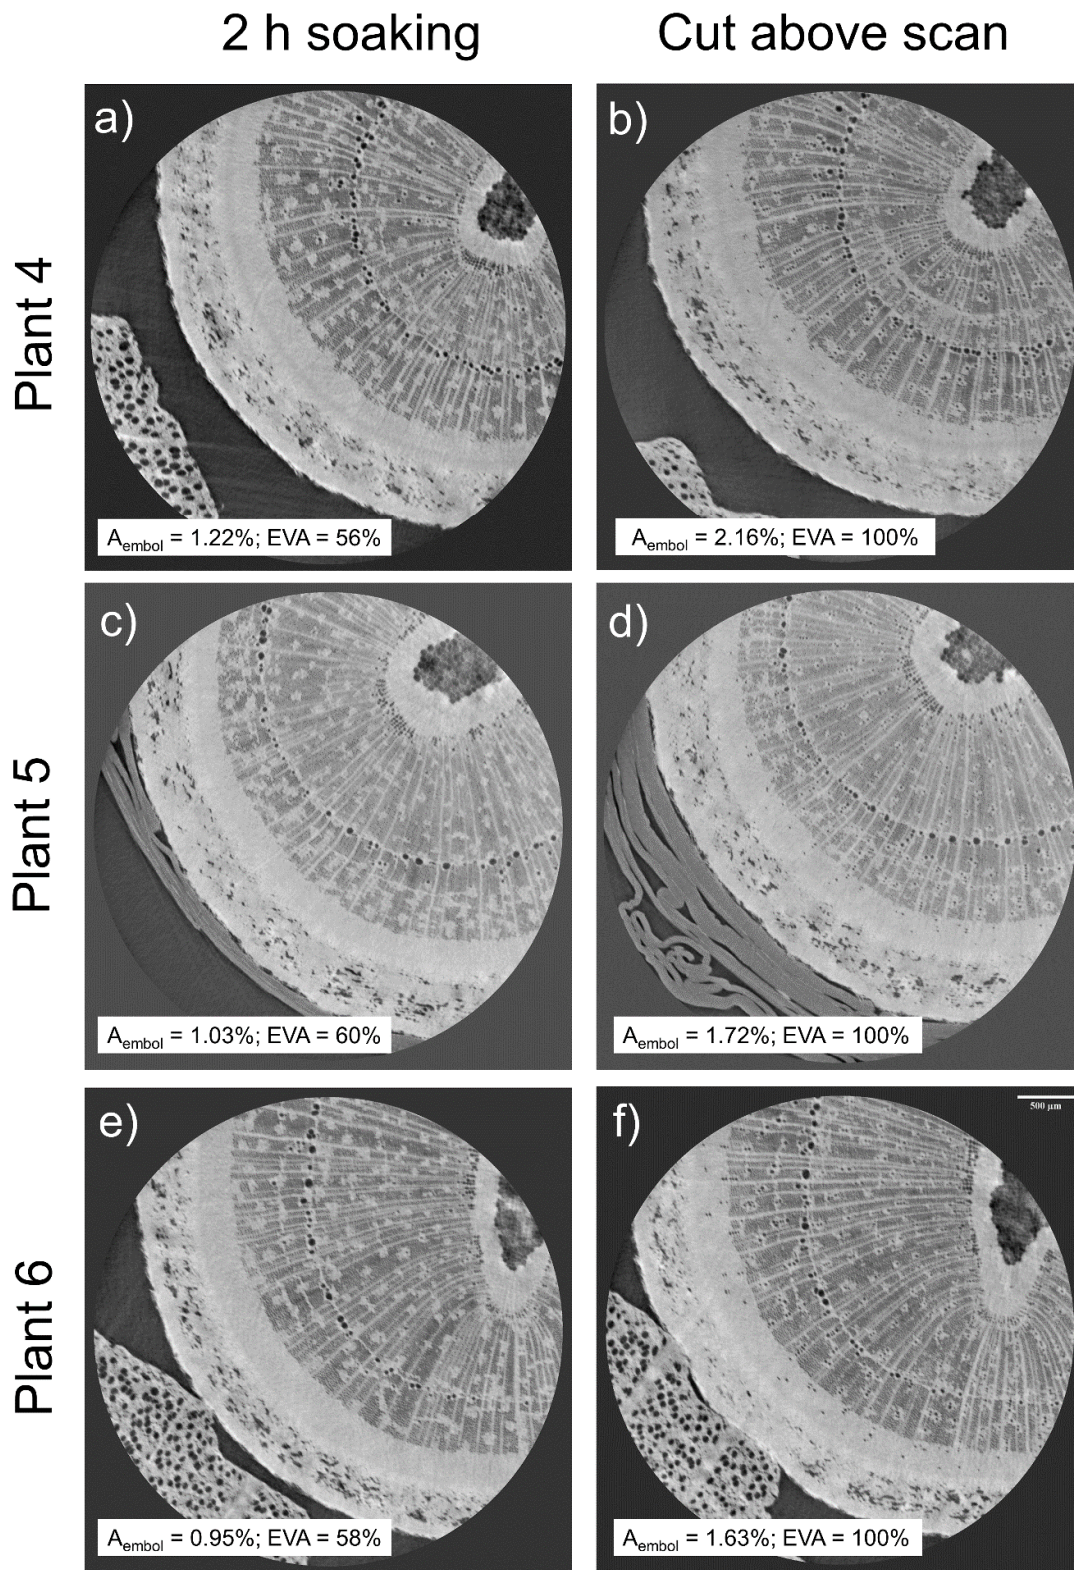

**Figure S3.** X-ray Micro-CT transverse images of 2-year-old *F. ornus* stem segments after the soaking treatment ( $S_{2h}$ ,  $n=3$ ). Scans were performed in drought-stressed segments soaked under light for 2

hours (a,c,e) and after cutting above the scanned region to embolize all mature conduits (b,d,f).  $A_{\text{embol}}$  = percentage of embolized sapwood area; EVA = percentage of embolized vessel area.
